# Supplementary material
Source: PubMed Central journal article supplement (PMC4968230)
Supplement: kaup-12-08-1184799-s001.pdf [file kaup-12-08-1184799-s001.pdf]

**Table S1.** List of mouse models used for the experiments.

| Nomenclature                                              | Acronym         | Definition                                                                    |
|-----------------------------------------------------------|-----------------|-------------------------------------------------------------------------------|
| <i>Atg7</i> <sup>F/F</sup>                                | <i>Atg7</i> cWT | <i>Atg7</i> (autophagy related 7) conditional wild-type (floxed <i>Atg7</i> ) |
| <i>Atg7</i> <sup>F/F</sup> ; <i>Lyz2-Cre</i> <sup>+</sup> | <i>Atg7</i> cKO | Myeloid cell-specific <i>Atg7</i> knockout                                    |
| <i>ob/w</i>                                               | <i>ob/w</i>     | Heterozygous <i>Lep</i> knockout                                              |
| <i>ob/ob</i>                                              | <i>ob/ob</i>    | Homozygous <i>Lep</i> knockout                                                |

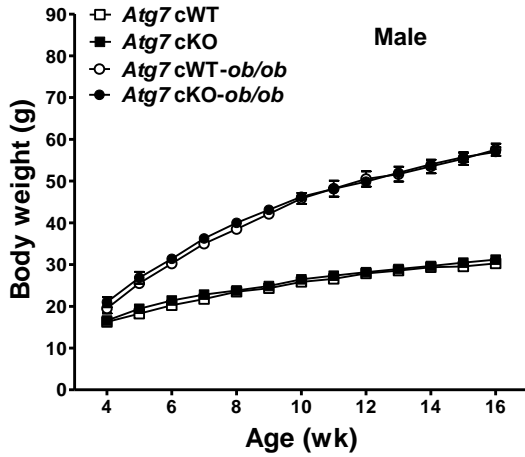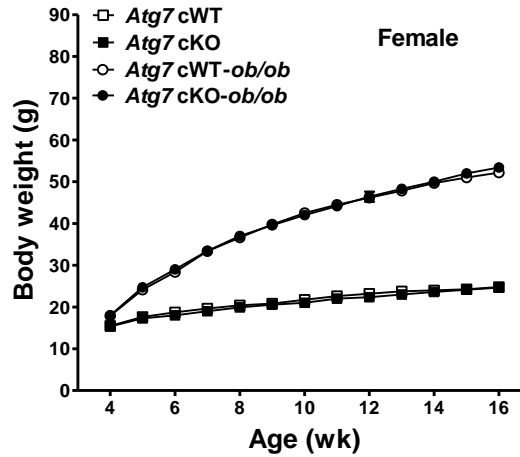

**Figure S1.** Body weight of *Atg7* cKO, *Atg7* cKO-*ob/ob* and respective control mice was monitored.

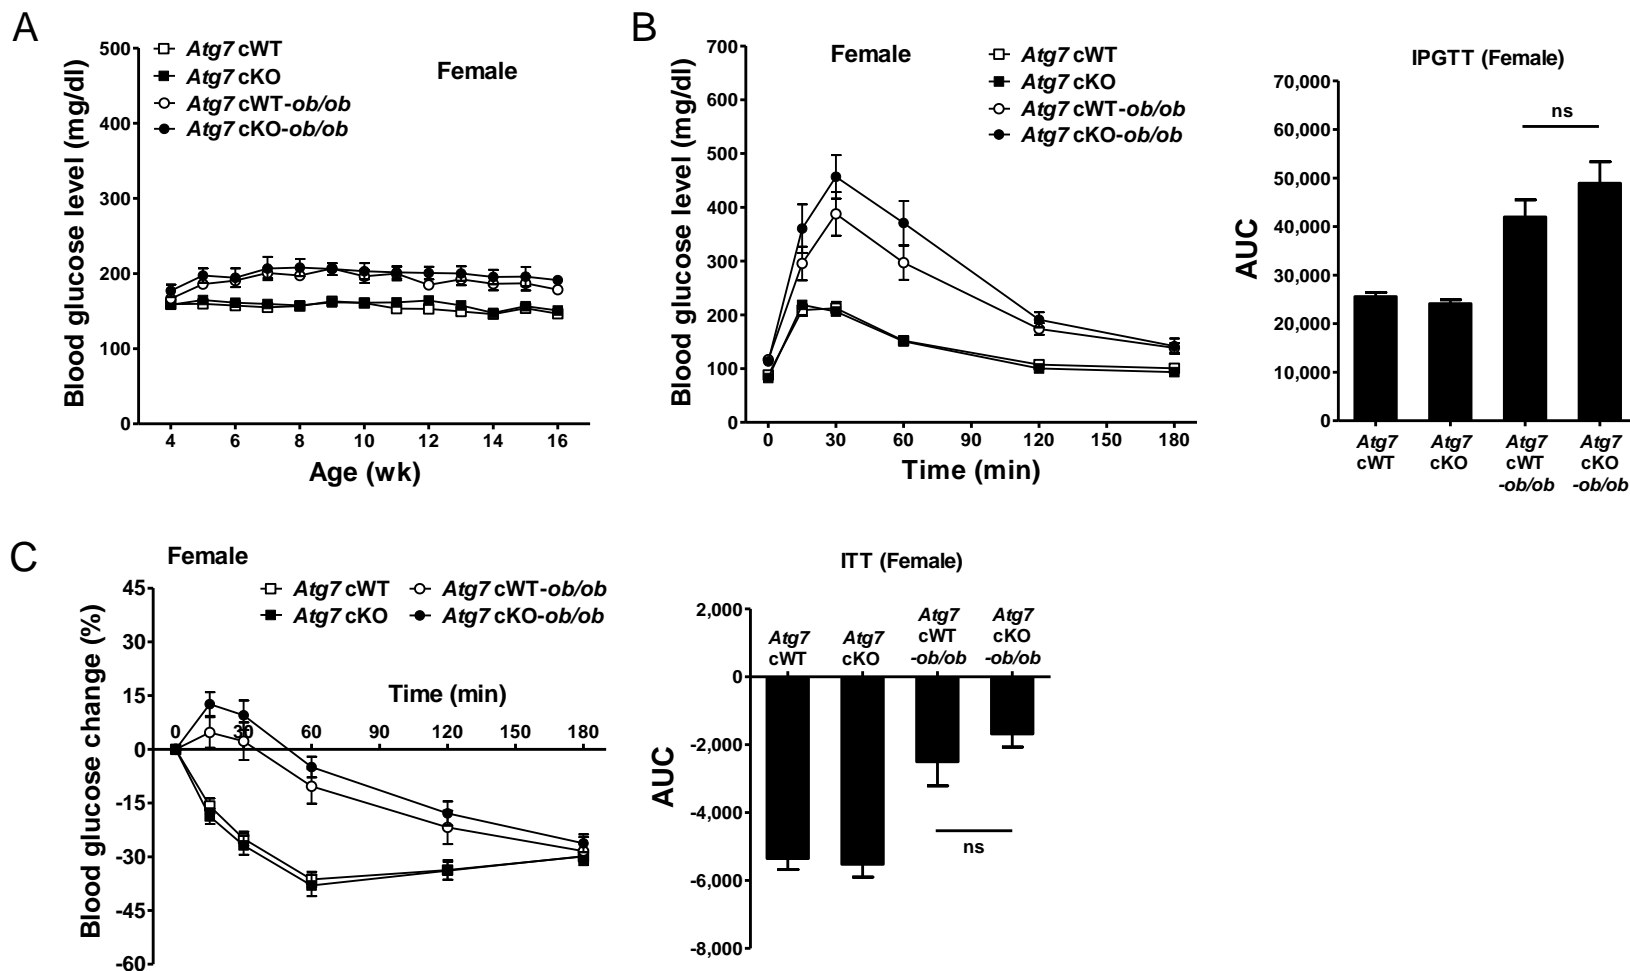

**Figure S2.** Metabolic profile of female *Atg7* cKO mice. **(A)** Nonfasting blood glucose level was determined in female *Atg7* cKO, *Atg7* cKO-*ob/ob* and respective control mice (n = 10 to 25). **(B)** IPGTT was done in overnight-fasted 16-wk-old female mice, and AUC calculated (n = 6 to 12). **(C)** ITT was done in fasted 16-wk-old female mice, and AUC calculated (n = 6 to 12). ns, not significant.

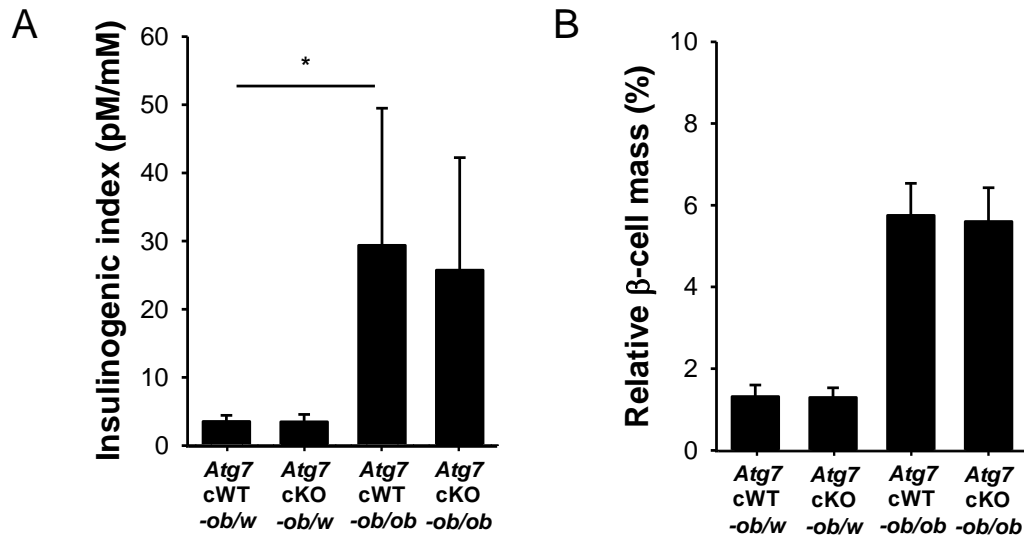

**Figure S3.**  $\beta$ -cells in *Atg7* cKO mice. **(A)** The insulinogenic index was calculated in 16-wk-old male mice as described in the Materials and Methods (n = 4 to 12). **(B)** Relative  $\beta$ -cell mass was assessed in 12 to 16-wk-old male mice by point counting morphometry (n = 4 each). \*,  $P < 0.05$ .

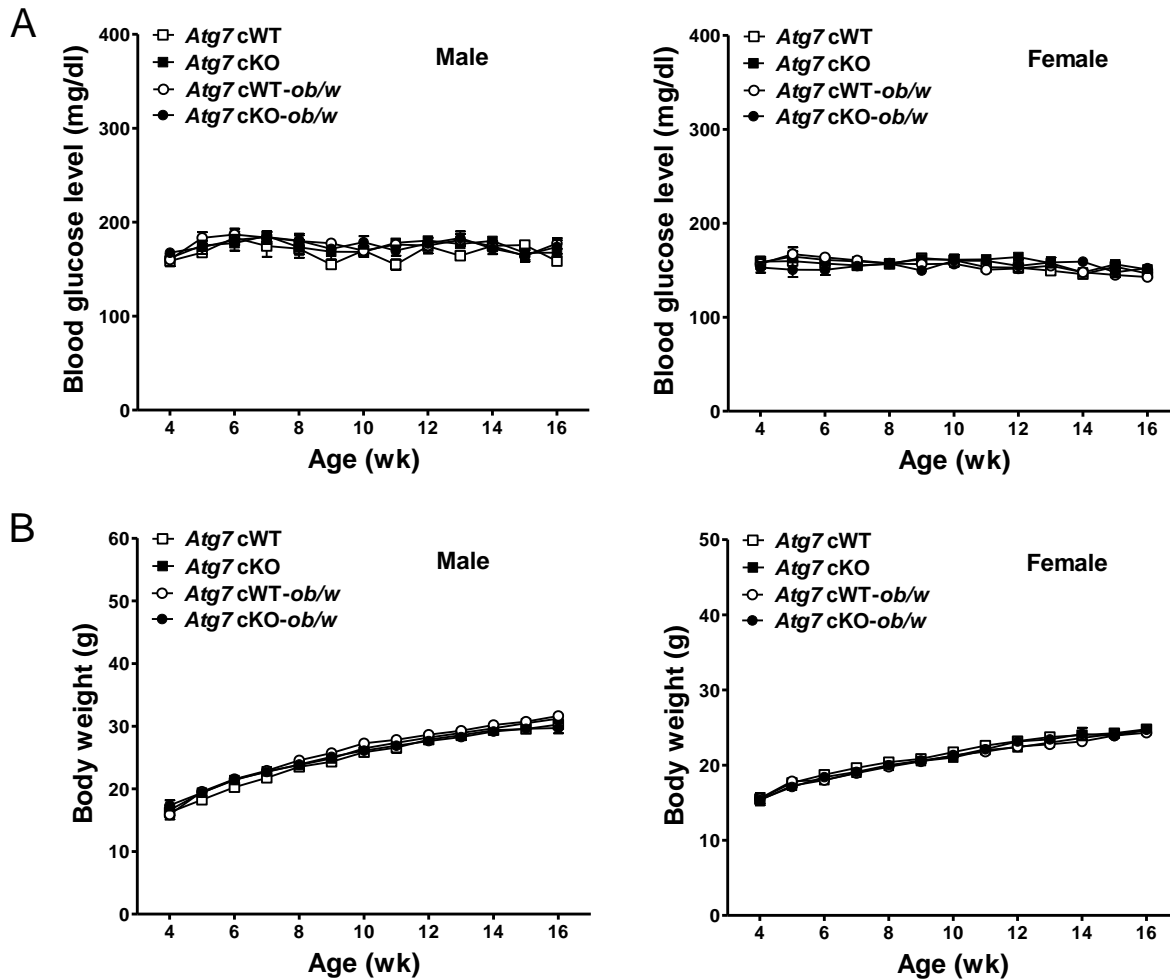

**Figure S4.** Glucose profile and body weight of *Atg7* cWT, *Atg7* cKO, *Atg7* cWT-*ob/w* and *Atg7* cKO-*ob/w* mice. Nonfasting blood glucose level and body weight of *Atg7* cKO-*ob/w* and *Atg7* cWT-*ob/w* mice were not different from those of *Atg7* cKO and *Atg7* cWT mice, respectively (male, n = 10 to 15; female, n = 10 to 14).

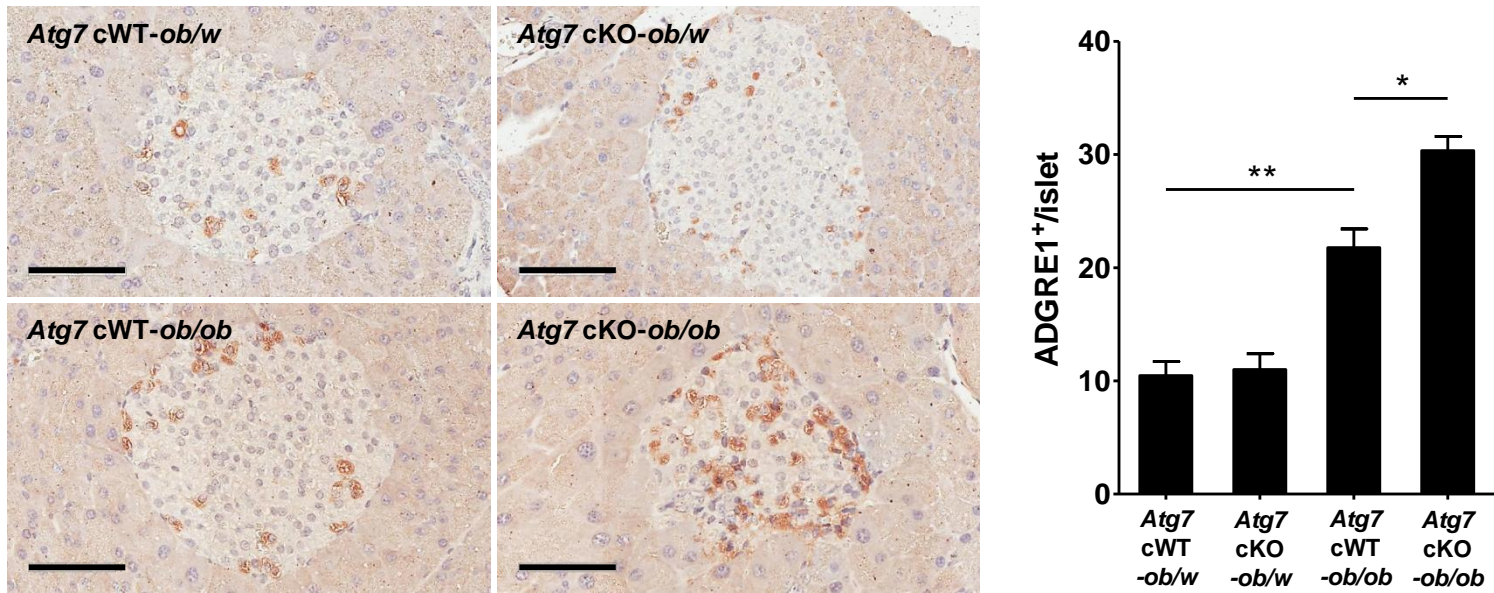

**Figure S5.** Infiltration of ADGRE1<sup>+</sup> MΦs into islets was evaluated by immunohistochemistry and expressed as the number of ADGRE1<sup>+</sup> cells/islet. Representative immunostained sections are shown (left). \*,  $P < 0.05$ .

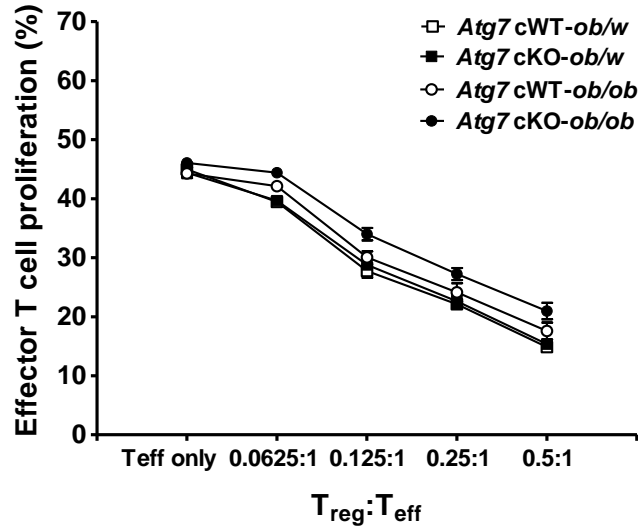

**Figure S6.** Suppressive activity of Treg cells in adipose tissue from male mice of each genotype. Graded numbers of CD4<sup>+</sup> IL2RA<sup>+</sup> Treg cells prepared from the SVF using a MACS Regulatory T cell isolation kit were cocultured with CFSE-labelled CD4<sup>+</sup> IL2RA<sup>-</sup> T cells and irradiated non-CD4<sup>+</sup> T cells in the presence of anti-CD3E Ab for a total of 3 days. Proliferation of CFSE-labelled T effector cells was assessed by flow cytometry.

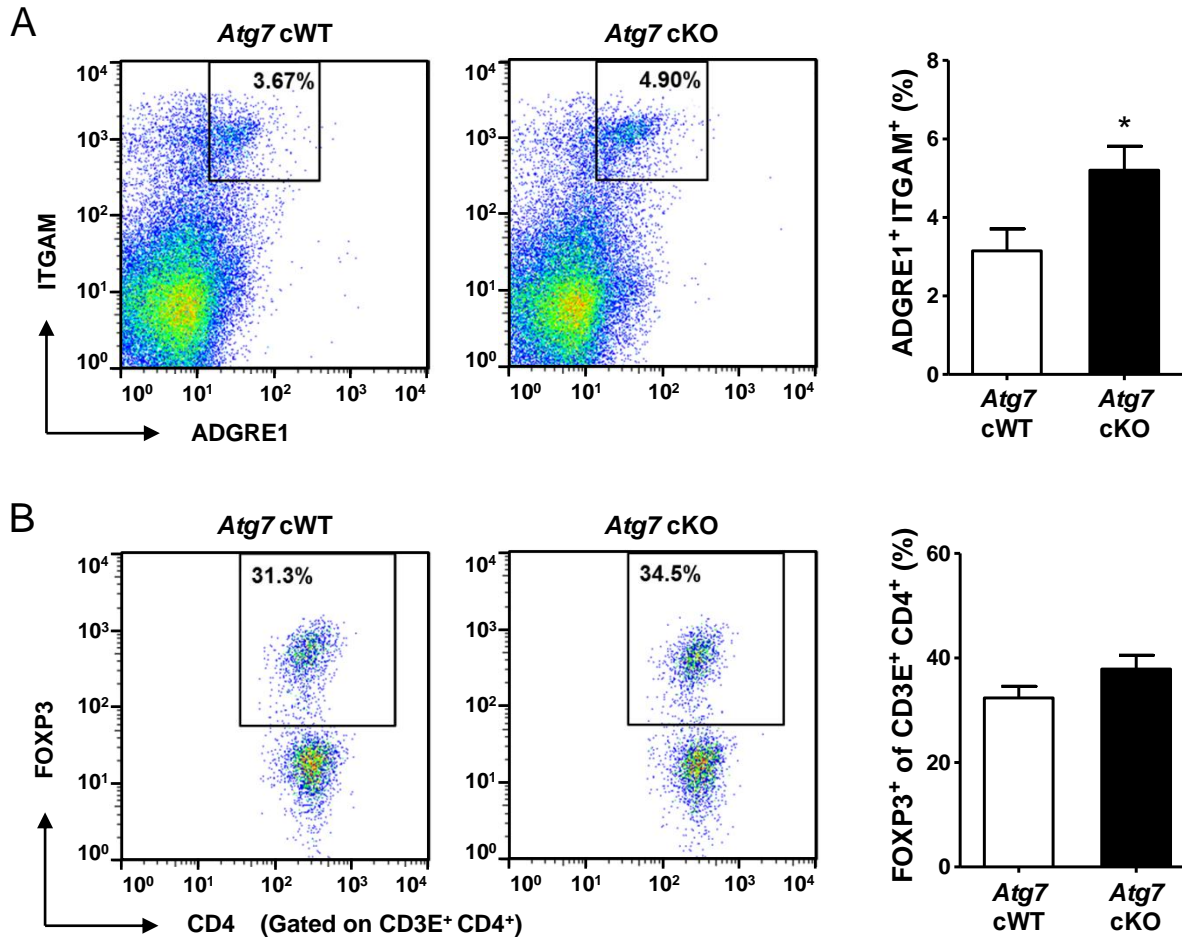

**Figure S7.** Myeloid cells and Treg cells in the colonic lamina propria after DSS treatment. The proportion of ADGRE1<sup>+</sup> ITGAM<sup>+</sup> myeloid cells (**A**) and that of FOXP3<sup>+</sup> CD4<sup>+</sup> Treg cells (**B**) were evaluated on day 7 of DSS treatment by flow cytometry (n = 4 each) (right). Representative scattergrams are shown (left). \*,  $P < 0.05$ .
